# Supplementary material
Source: Springer Nature journal article supplement (https://www.springermedizin.de/resource/supplementary/13002_2008_130_MOESM7_ESM.pdf/9627220)

## Parts of plant used - *X. americana*

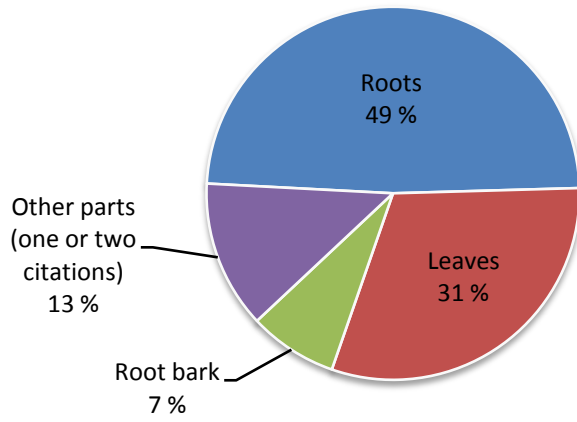

Supplement: MOESM7 [file 9627220]
